# Supplementary material for: Dynamic methylation of histone H3K18 in differentiating Theileria parasites
Source: PubMed Central journal article supplement (PMC8163883; doi:10.1038/s41467-021-23477-2), 2021-05-28
Supplement: 41467_2021_23477_MOESM1_ESM.pdf [file 41467_2021_23477_MOESM1_ESM.pdf]

1 **SUPPLEMENTARY INFORMATION**

2

3

4 **TITLE**

5 **Dynamic methylation of histone H3K18 in differentiating *Theileria* parasites**

6

7 **Authors**

8

9 Kevin Cheeseman\*<sup>1</sup>, Guillaume Jannot\*<sup>1</sup>, Nelly Lourenço\*<sup>1</sup>, Marie Villares\*<sup>1</sup>, Jérémy Berthelet<sup>1</sup>, Teresa  
10 Calegari-Silva<sup>1</sup>, Juliette Hamroune<sup>3</sup>, Franck Letourneur<sup>3</sup>, Fernando Rodrigues-Lima<sup>2</sup>, Jonathan B.  
11 Weitzman<sup>1</sup>

12

13

14

15

16

17 **Supplementary Data Figures 1-17**

18 **Supplementary Tables 1-5**

19

20  
21  
22  
23  
24  
25  
26  
27  
28  
29  
30  
31  
32  
33  
34  
35  
36  
37  
38  
39  
40  
41  
42  
43  
44  
45  
46  
47  
48  
49  
50  
51

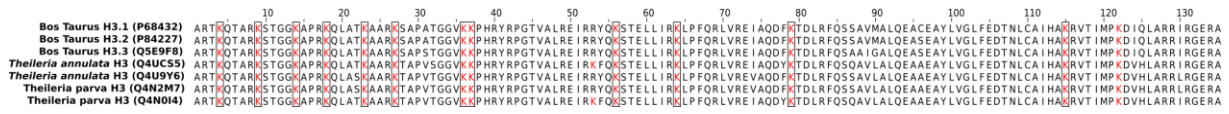

**Supplementary Figure 1: Conserved histone sequences in cows and *Theileria* parasites.**

Multiple alignments of the protein sequences of N-terminal tails of *Bos taurus* Histone H3.1, H3.2 and H3.3, together with the two histone H3 proteins in the *T. annulata* and *T. parva* genomes. Highly conserved lysine residues (K) are highlighted in red and the UniProt accession numbers indicated.

52  
53  
54  
55  
56  
57  
58  
59  
60  
61  
62  
63  
64  
65  
66  
67  
68  
69  
70  
71  
72  
73  
74  
75  
76  
77  
78  
79  
80  
81  
82  
83  
84  
85  
86

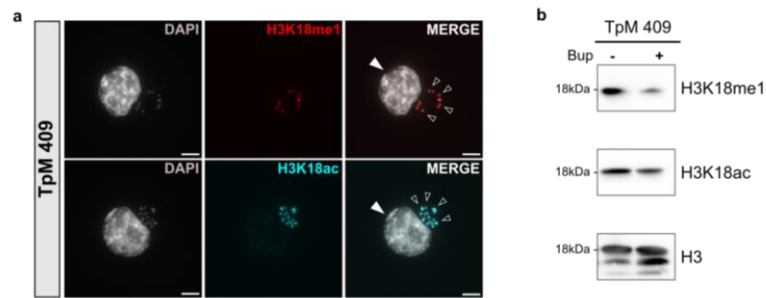

### Supplementary Figure 2: Methylation of H3K18 in *T. parva* parasites.

- a. Immunofluorescence analysis of H3K18me1 (red) and H3K18ac (cyan) staining of TpM409 cells infected with *T. parva*. Host and parasite nuclei are stained with DAPI (grey). The solid white arrowheads indicate the host cell nucleus and empty white arrowheads point to the parasite nuclei. Leica microscope, 100X, Scale bar = 5 $\mu$ m.
- b. Western blot analysis of TpM409 cells treated with Buparvaquone (Bup), a theilericidal drug. H3 was used as a loading control.

All these experiments were performed three times independently with similar results; these data show one of these three times. Full scans of blots and immunofluorescence replicates are included in the Source Data file.

87  
88  
89  
90  
91  
92  
93  
94  
95  
96  
97  
98  
99  
100  
101  
102  
103  
104  
105  
106  
107  
108  
109  
110  
111  
112  
113  
114  
115  
116  
117  
118  
119  
120  
121

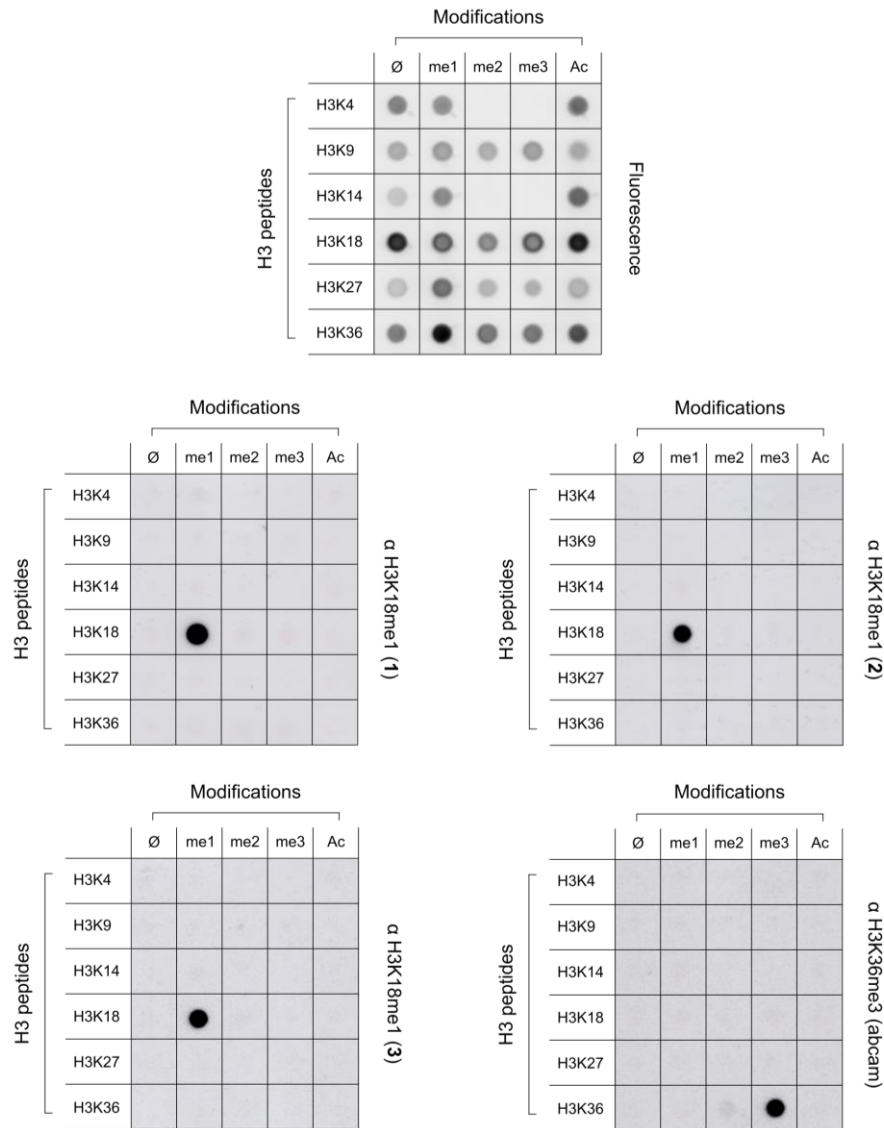

**Supplementary Figure 3: Characterization of antibody specificity using H3-derived modified peptides.**

Results of dot-blot analysis testing three independent antibodies recognizing mono-methylated H3K18 against a range of peptide sequences. 2 µg of 5-FAM coupled short peptides flanking the unmodified, methylated or acetylated lysine of interest (namely H3K4: ARTKQTARRSK, H3K9: RQTARKSTGG, H3K14: STGGKAPRR, H3K18: RAPRKQLAT, H3K27: TKAARKSAPAT and H3K36: TGGVKRPHR) were transferred onto a nitrocellulose membrane and immunodetected using either antibodies against H3K18me1 (1: Abcam #ab177253, 2: Active Motif #31259, 3: a home-made antibody provided by Jane Mellor's laboratory) or H3K36me3 (Abcam #ab9050). Fluorescence of peptides was also detected as a dotting control.

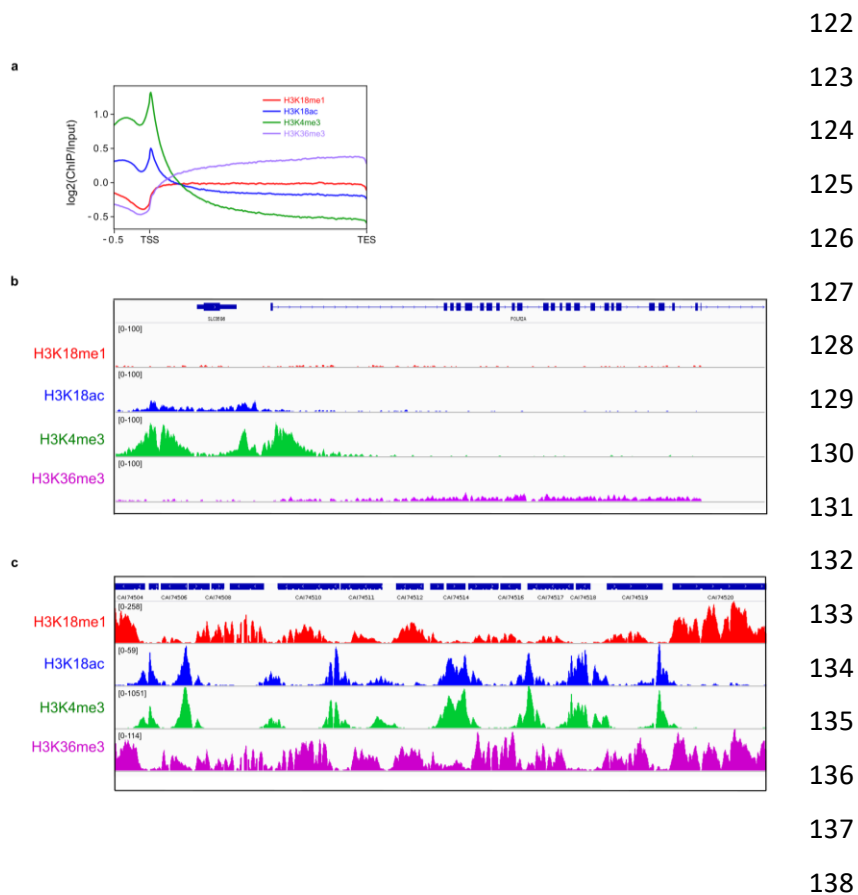

139

140

141 **Supplementary Figure 4: H3K18me is not found on gene bodies on the bovine genome.**

142 a. Average occupancy profiles for H3K4me3 (green), H3K18ac (blue), H3K18me1 (red) and  
 143 H3K36me3 (purple) around the transcriptional start site (TSS) of all *Bos taurus* genes. X-axis:  
 144 genome coordinates starting from 500 bp before the TSS to the TES. Y-Axis: log<sub>2</sub> (ChIP/Input).  
 145 H3K4me3 and H3K18ac profiles display enrichment around the TSS region, whereas  
 146 H3K36me3 is depleted at the TSS and shows an enrichment over the gene bodies. H3K18me1  
 147 is not enriched on the bovine genome.

148 b. Chromatin ChIP-Seq profiles over a 25 kb-long representative region of the *Bos taurus*  
 149 genome. Top track: Annotations, H3K18me1 (red), H3K18ac (blue), H3K4me3 (green), and  
 150 H3K36me3 (purple).

151 c. Chromatin ChIP-Seq profiles over a 25 kb-long representative region of the *T. annulata*  
 152 genome. Annotations, H3K18me1 (red), H3K18ac (blue), H3K4me3 (green), and H3K36me3  
 153 (purple).

154

155  
156  
157  
158  
159  
160  
161  
162  
163  
164  
165  
166  
167  
168  
169  
170  
171  
172  
173  
174  
175  
176  
177  
178  
179  
180  
181  
182  
183  
184  
185  
186  
187  
188  
189

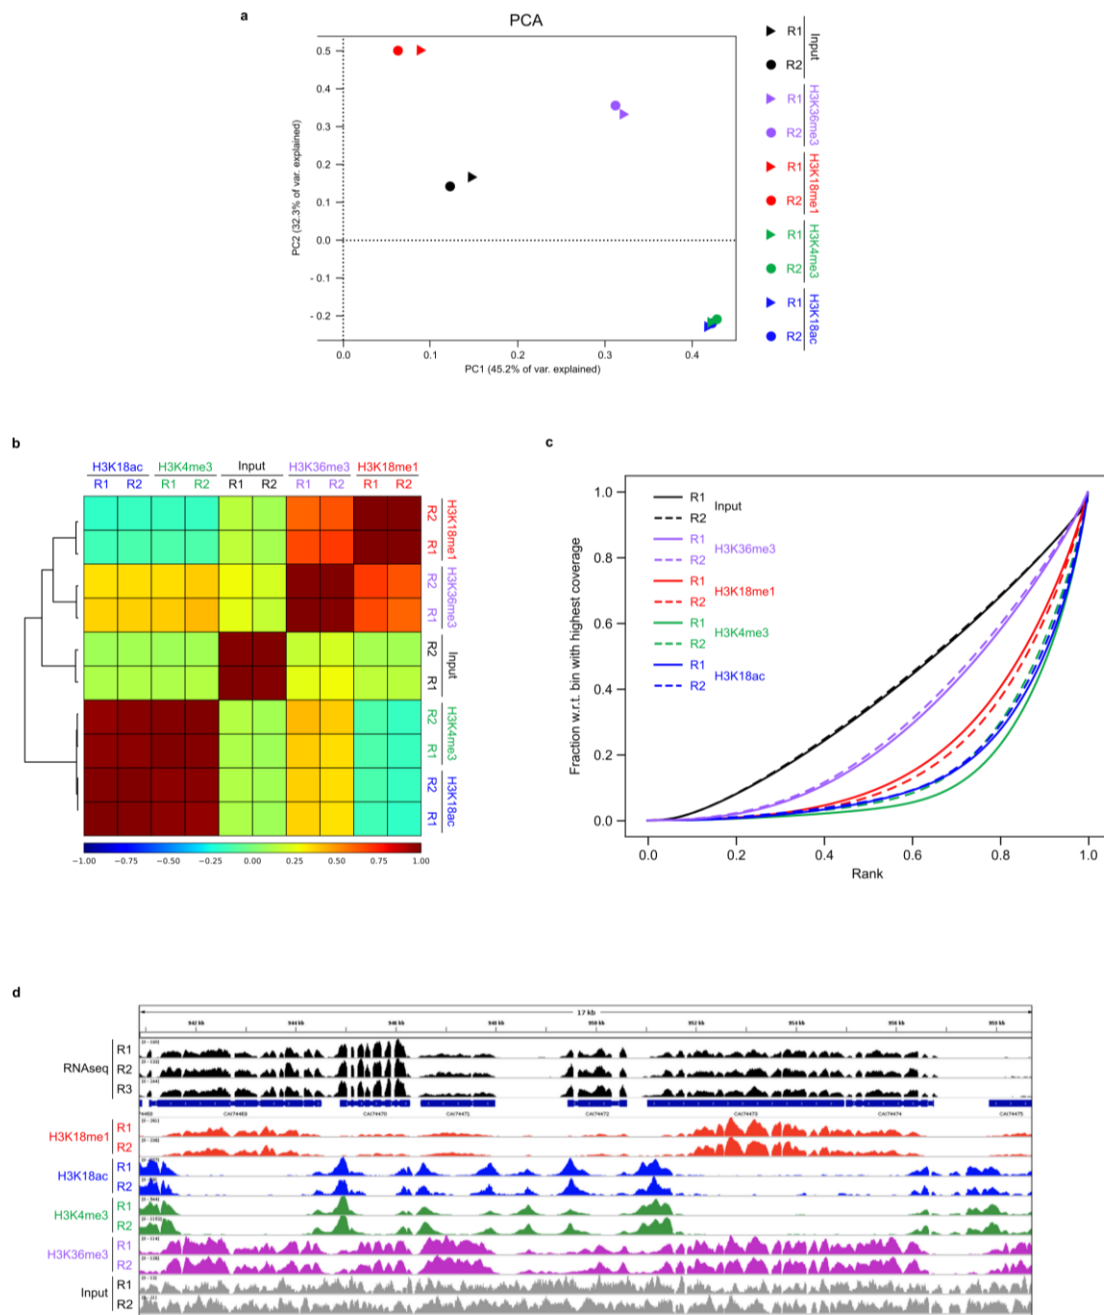

**Supplementary Figure 5: Spearman correlation plot of ChIP-Seq data on the parasite genome.**

- a. Graph of the Principal component analysis (PCA) for the various ChIP duplicate samples demonstrating good correlation between replicates.
- b. Clustered Heatmap of H3K18me1, H3K18ac and H3K4me3 and H3K36me3 Spearman correlation coefficients for read mapping from the ChIP-Seq analysis of the parasite genome. Clustering was performed using the nearest point algorithm.

- 190 c. Results of the deepTools plotFingerprint analysis to evaluate ChIP enrichment.
- 191 d. Genome browser tracks depicting epigenetic profiles in replicate samples (these data are
- 192 merged in the presentation in Figure 2e). RNAseq (three replicas, black), H3K18me1 (red),
- 193 H3K18ac (blue), H3K4me3 (green), H3K36me3 (purple) and Input (grey).

194  
195  
196  
197  
198  
199  
200  
201  
202  
203  
204  
205  
206  
207  
208  
209  
210  
211  
212  
213  
214  
215  
216  
217  
218  
219  
220  
221  
222  
223  
224

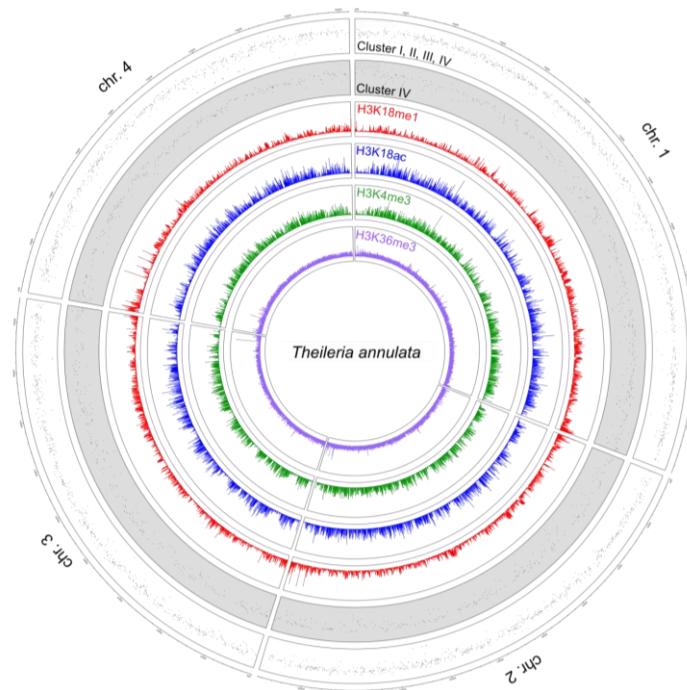

**Supplementary Figure 6: Circular chromosomal representation of ChIP-seq and gene expression.**

Representation of the four chromosomes (chr. 1-4) of the *T. annulata* genome: each circular track showing (from the innermost track): H3K36me3 (purple), H3K4me3 (green), H3K18ac (blue) and H3K18me1 (red) ChIPseq data, the last two tracks show log<sub>10</sub>(RPKM) gene expression values for genes belonging to cluster IV (light grey background) or to clusters I, II, III & V.



260  
 261  
 262  
 263  
 264  
 265  
 266  
 267  
 268  
 269  
 270  
 271  
 272  
 273  
 274  
 275  
 276  
 277  
 278  
 279  
 280  
 281  
 282  
 283  
 284  
 285  
 286  
 287  
 288  
 289  
 290  
 291  
 292  
 293  
 294

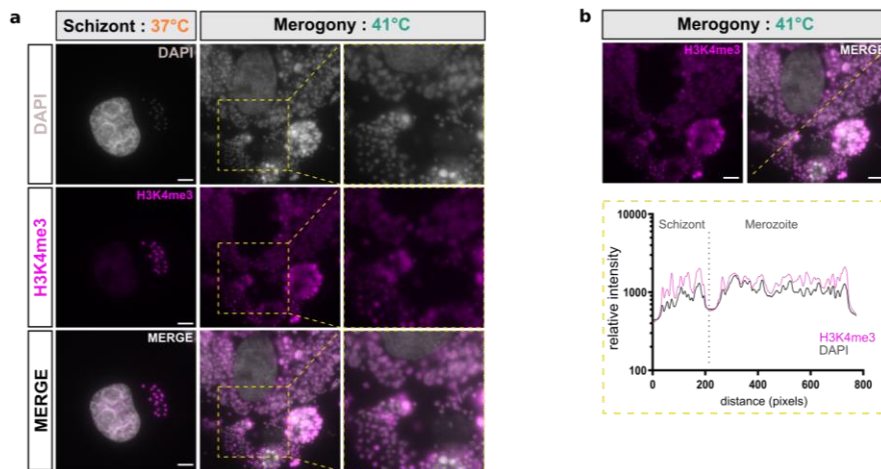

#### Supplementary Figure 7: H3K4me3 staining upon merogony.

- a. Immunofluorescence analysis of TaC12 infected macrophages cultured at 37°C (left) or following merogony induction for 8 days at 41°C (right). Host and parasite nuclei are stained with DAPI (grey) or a specific antibody against H3K4me3 (magenta). Leica microscope, 100X, Scale bar = 5µm.
- b. Quantification of immunofluorescence intensity of H3K4me3 (magenta) compared to DNA (grey) showing constant staining across all parasites. The plot profiles represent the yellow line cross-section.

All these experiments were performed three times independently with similar results; these data show a representative example of these three times.

295  
 296  
 297  
 298  
 299  
 300  
 301  
 302  
 303  
 304  
 305  
 306  
 307  
 308  
 309  
 310  
 311  
 312  
 313  
 314  
 315  
 316  
 317  
 318  
 319  
 320  
 321  
 322  
 323  
 324  
 325  
 326  
 327  
 328

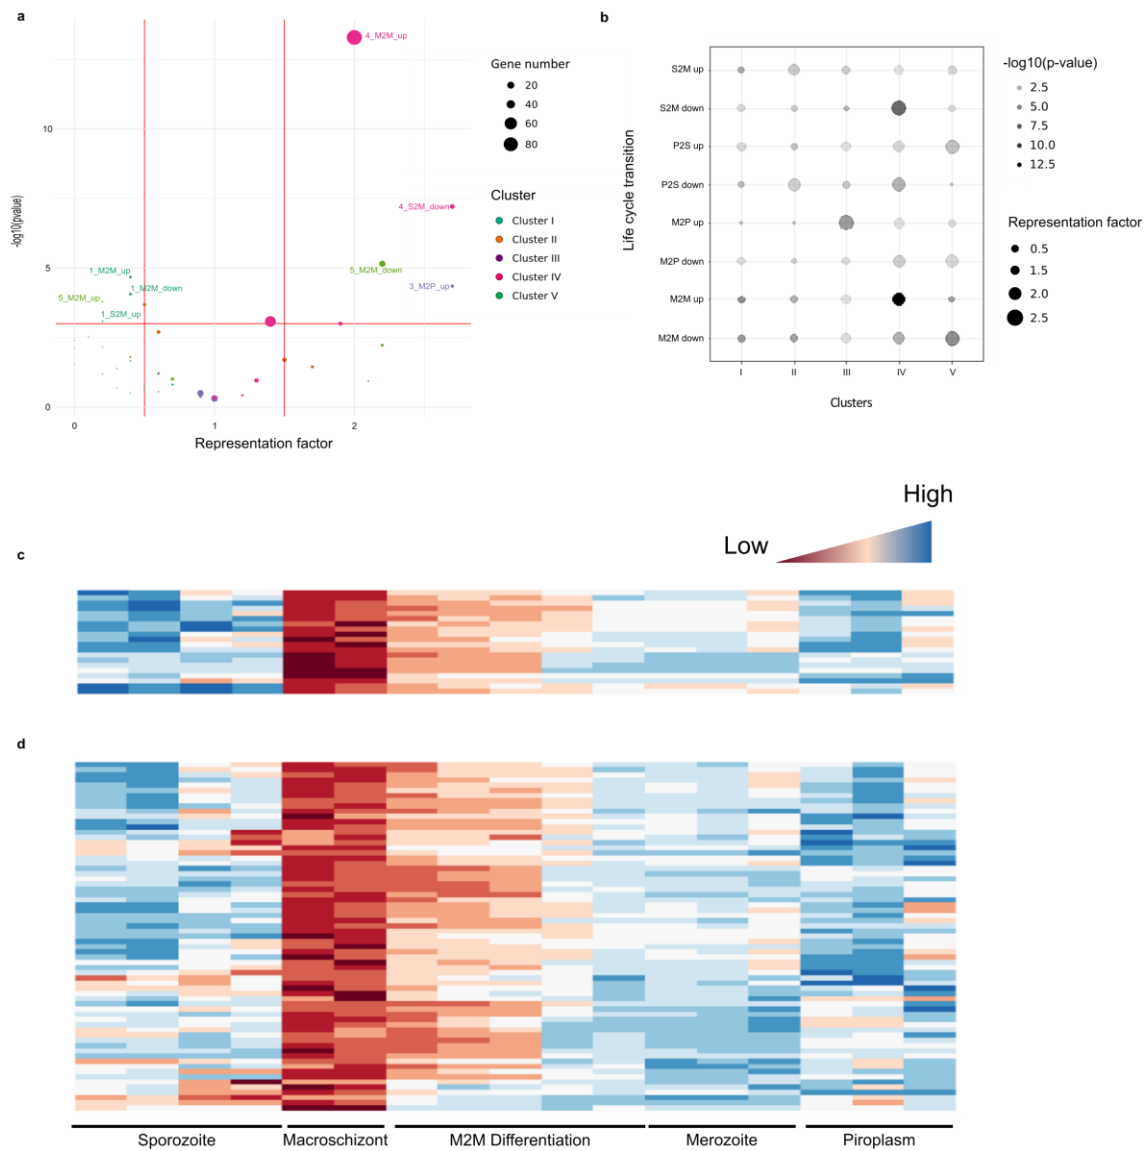

### Supplementary Figure 8: Analysis of differentially expressed genes across the parasite life cycle.

- a. Chart showing the representation factor as a function of p-value for each life cycle transition as reported by Pieszko *et al.* Dot size is defined by gene number, and colours indicate genes from the different clusters. The vertical red lines indicate representation factors of 0.5 or 1.5 and the horizontal red line indicates a p-value of 0.001. Only groups with a p-value < 0.001 and a representation factor > 1.5 or < 0.5 are labelled. Labels: M2M\_up and M2M\_down, macroschizont to merozoite upregulated or down-regulated genes; S2M\_up and S2M\_down, sporozoite to macroschizont upregulated or down-regulated genes; M2P\_up, merozoite to

- 329 piroplasm up-regulated genes; and P2S\_down, piroplasm to sporozoite down-regulated  
330 genes. Notably, the M2M and S2M dots corresponding to Cluster IV are highly significant.
- 331 b. Dot chart of representation factors and p-values of overlap between differentially expressed  
332 genes in the transition to different life cycle stages derived from a published microarray  
333 (Pieszko et al.) and presently derived clusters. Dot transparency is plotted as p-value and dot  
334 size displays the representation factor: S2M\_up and S2M\_down, sporozoite to macroschizont  
335 up-regulated or downregulated genes; P2S\_up and P2S\_down, piroplasm to sporozoite up-  
336 regulated or downregulated genes; M2P\_up and M2P\_down, merozoite to piroplasm up-  
337 regulated or down-regulated genes; and M2M\_up and M2M\_down, macroschizont to  
338 merozoite up-regulated or down-regulated genes.
- 339 c. Analysis of gene expression profiles in differentiating parasites and correlation with cluster IV.  
340 Investigation of the parasite genes belonging to cluster IV over the course of the life-cycle  
341 (sporozoite>macroschizont->differentiation to merozoite -> merozoite->piroplasm) using the  
342 microarray data from Pieszko *et al.* (2015). Heatmap analysis of the 20 genes that overlap in  
343 the S2M-down:M2Mup: cluster IV subgroup (listed in Table 1).
- 344 d. Heatmap analysis of the 67 parasite genes from in the M2M-up: cluster IV subset (listed in  
345 Table 2). Heatmap scale based on z-score of expression values from series GSE71307  
346 (<https://www.ncbi.nlm.nih.gov/geo/query/acc.cgi?acc=GSE71307>), and coloured from red to  
347 blue (low expression to high expression).
- 348  
349  
350  
351  
352  
353  
354  
355  
356  
357  
358  
359  
360  
361  
362  
363

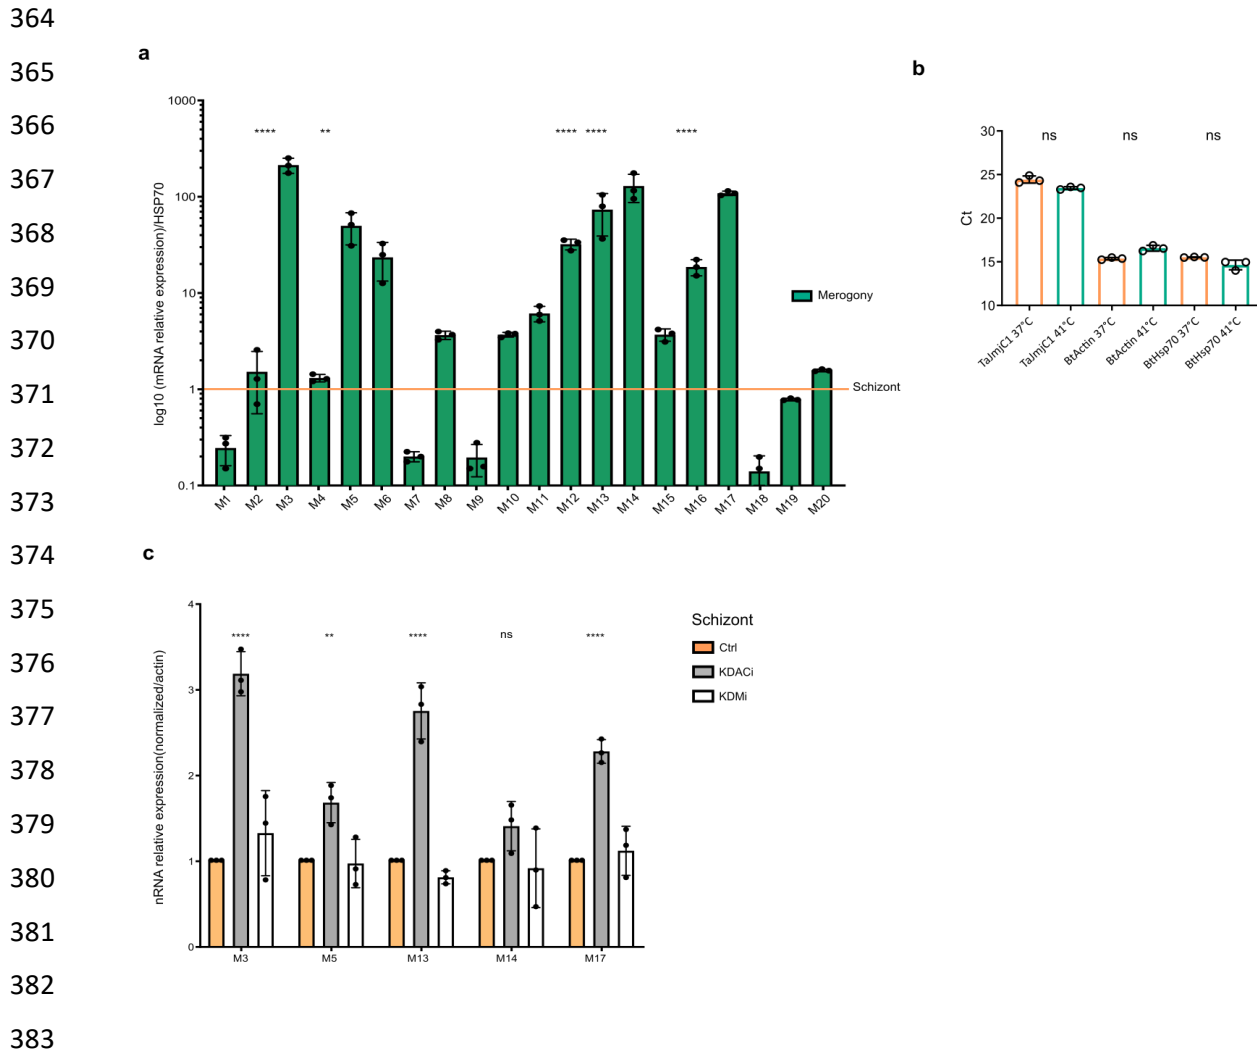

384 **Supplementary Figure 9: Expression of potential stage-associated Cluster IV genes.**

- 385 a. Expression analysis (RT-qPCR) of the 20 identified *M2M* genes (listed in Supplementary Table  
386 1) in infected TaC12 macrophages, before and after merogony induction culture conditions.  
387 The orange line indicates the relative gene expression in cells grown at 37°C (macroschizont  
388 stage). The results represent the mean of expression results from three independent  
389 experiments. 15 of the *M2M* genes increased in expression upon merogony. Error bars  
390 represent the mean values +/- SD. ns p>0.99; \* p=0,0249; \*\*\*\* p<0.0001.
- 391 b. Expression analysis (RT-qPCR) of control genes (parasite, Ta or bovine, Bt) that do not show  
392 changes in expression upon induction of merogony.
- 393 c. Expression analysis (RT-qPCR) of selected *M2M* genes following treatment of TaC12 infected  
394 macrophages with epigenetic inhibitors KDACi (grey bars) or KDMi (white bars). Results are  
395 shown as the mean values +/- SD for three independent experiments with ns p>0.2310; \*\*  
396 p=0,0052; \*\*\*\* p<0.0001.
- 397 For all experiments n=3, Statistical Dunnett's multiple comparison test, two-sided: ns=not  
398 statistically significant; \*\*\*\* p<0.0001; \*\*p<0.005.

399  
 400  
 401  
 402  
 403  
 404  
 405  
 406  
 407  
 408  
 409  
 410  
 411  
 412  
 413  
 414  
 415  
 416  
 417  
 418  
 419  
 420  
 421  
 422  
 423  
 424  
 425  
 426  
 427  
 428  
 429  
 430  
 431  
 432  
 433

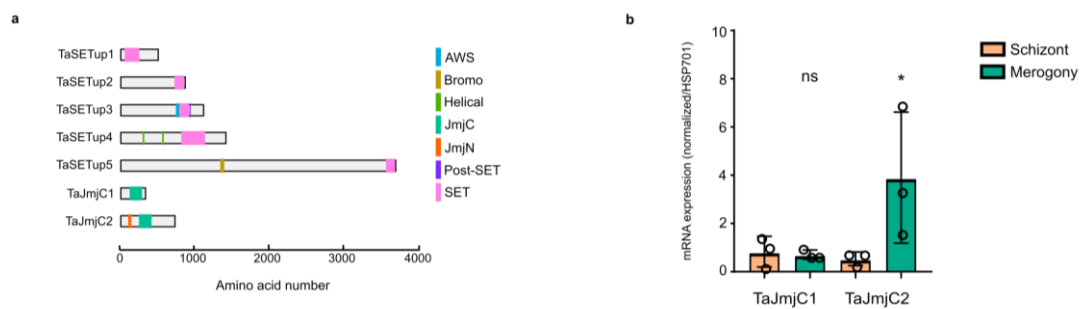

**Supplementary Figure 10: Schematic representation of SET domain proteins (TaSETup1-5) and potential demethylases (TaJmjC1-2)**

- Schematic representation of the five putative lysine methyltransferases (listed in Supplementary Table 4) and the two potential demethylases, indicating the presence of the putative catalytic SET domain and other domains, Jumonji domains (JmjC and JmjN), Bromo domain, AWS (Associated With SET) domain, and a post-SET domain.
- Expression analysis (RT-qPCR) of the two parasite putative demethylases in cells grown at 37°C (schizont stage) or at 41°C (merogony). The results represent the mean values +/- SD for three independent experiments. Statistical Dunnett's multiple comparison test, two-sided: ns=not statistically significant  $p > 0,9876$ ; \* $p < 0.0461$

434  
435  
436  
437  
438  
439  
440  
441  
442  
443  
444  
445  
446  
447  
448  
449  
450  
451  
452  
453

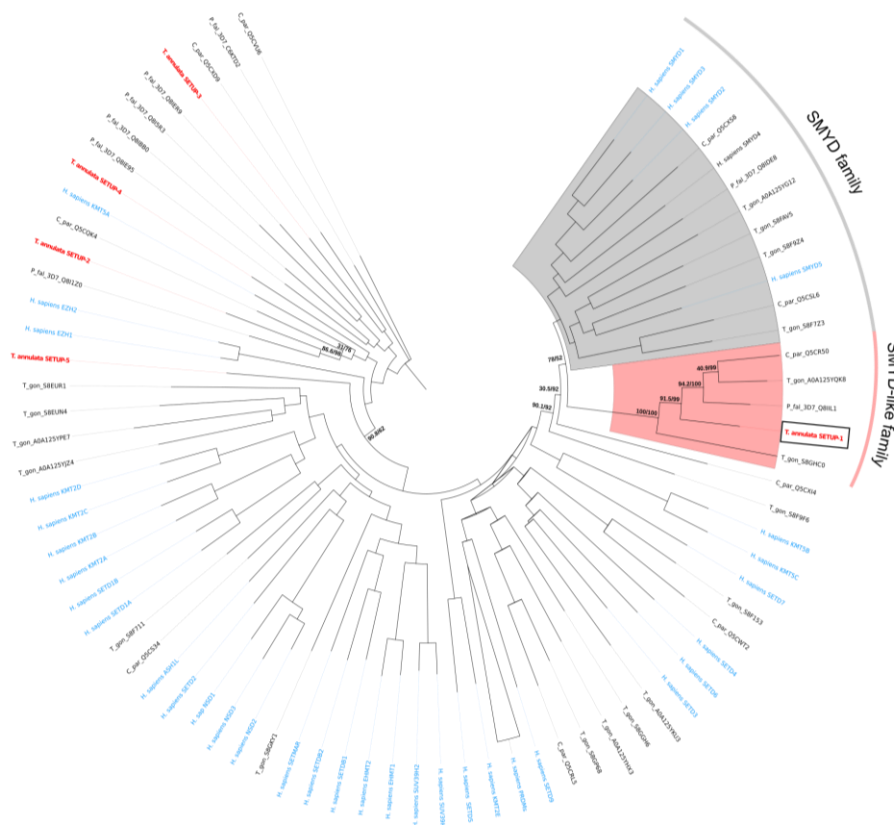

454 **Supplementary Figure 11: Phylogenetic analysis of genes encoding *Theileria* SETup proteins**

455 The tree is constructed with *Homo sapiens* KMT proteins (light blue with their generic names), *T.*  
456 *annulata* TaSETup proteins (red) and other apicomplexan proteins (black) with the species name first  
457 followed by their InterPro accession number. P\_fal\_3D7: *Plasmodium falciparum* 3D7, C\_par :  
458 *Cryptosporidium parvum*, T\_gon : *Toxoplasma gondii*. The SMYD (SET and MYND domain family) and  
459 SMYD-like orthologs are shown in grey and red boxes, respectively. Branch support values displaying  
460 branch support for the Ta-SETup proteins are indicated in the form ultra-fast bootstrap/alrt-sh like  
461 bootstrap values and were computed using iqtree software version 1.65.

462  
463  
464  
465  
466  
467  
468  
469  
470  
471  
472  
473  
474  
475  
476  
477  
478  
479  
480  
481  
482  
483  
484  
485  
486  
487  
488  
489  
490  
491  
492  
493  
494  
495

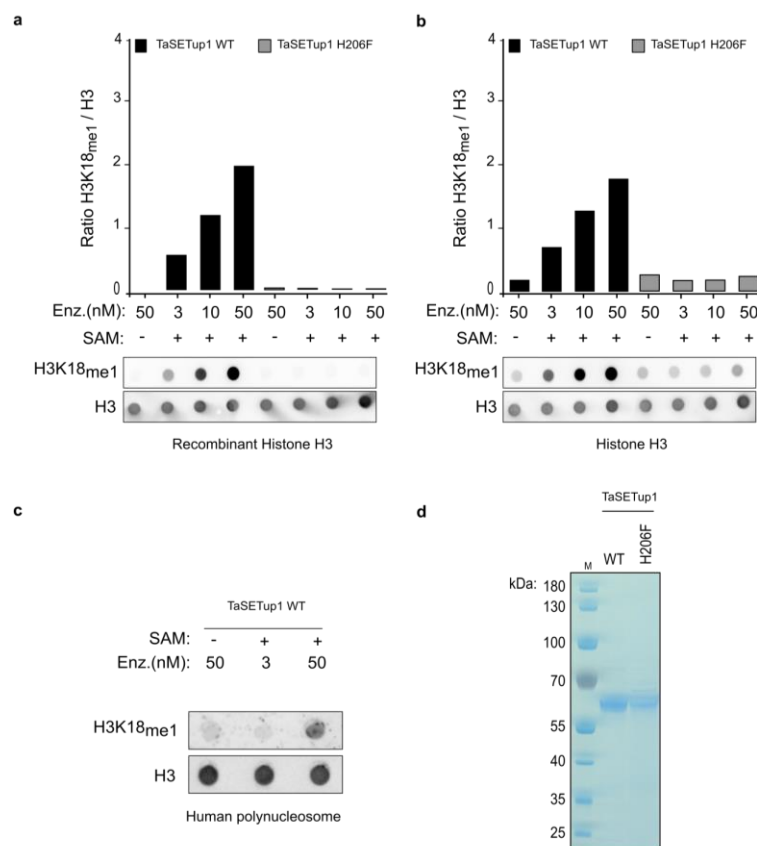

### Supplementary Figure 12: Assays of methyltransferase activity *in vitro* for TaSETup1

- Methyltransferase assay of recombinant TaSETup1 (wild-type WT or mutant H206F) incubated, with or without SAM and recombinant Histone H3, followed by immuno-dot-blot detection with a H3K18me1 antibody. Results were normalized to histone H3.
- As above, methyltransferase assay of recombinant TaSETup1 (wild-type WT or mutant H206F) using histone H3 from calf thymus as the substrate.
- Methyltransferase assay of recombinant TaSETup1 wild-type incubated with or without SAM and human polynucleosomes purified from HeLa cells (EpiCypher) followed by immuno-dot-blot detection with the H3K18me1 antibody.
- Coomassie staining of recombinant TaSETup1 wild-type WT or mutant H206F.

All these experiments were performed three times independently with similar results; these data shown represent one of these three experiments.

496  
497  
498  
499  
500  
501  
502  
503  
504  
505  
506  
507  
508  
509  
510  
511  
512  
513  
514  
515  
516  
517  
518  
519  
520  
521  
522  
523  
524  
525  
526  
527  
528  
529

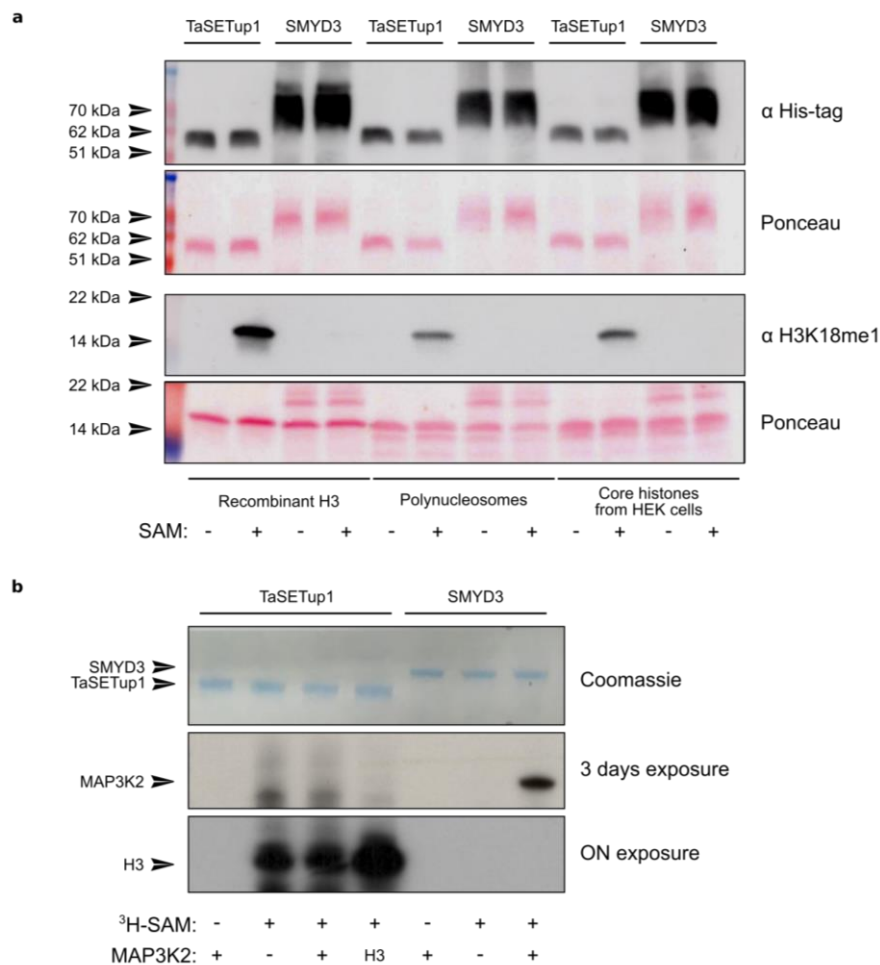

**Supplementary Figure 13: Comparison of TaSETup1 and SMYD3 methyltransferase activity on different substrates**

**a.** Methyltransferase assay of recombinant TaSETup1 or SMYD3 enzymes with recombinant histone H3, chicken polynucleosomes and core histones substrates extracted from HEK cells. 1 µg of enzyme was incubated with or without SAM and with histone substrates at 30°C overnight. Samples were then separated by SDS-PAGE followed by immuno-blot detection with an H3K18me1 antibody.

**b.** Radiometric methyltransferase assay of recombinant TaSETup1 or SMYD3 proteins with recombinant MAP3K2 or histone H3 substrates. 1 µg of enzyme was incubated with or without <sup>3</sup>H-SAM and with recombinant MAP3K2 or H3 substrate at 30°C overnight. Samples were separated by SDS-PAGE and gel was Coomassie stained. Incorporation of the <sup>3</sup>H-methyl group was detected as an autoradiographic signal at different time points.

All these experiments were performed three times independently with similar results; a representative of the three experiments is shown.



530  
531  
532  
533  
534  
535  
536  
537  
538  
539  
540  
541  
542  
543  
544  
545  
546  
547  
548  
549  
550  
551  
552  
553  
554  
555  
556  
557  
558  
559  
560  
561  
562  
563  
564

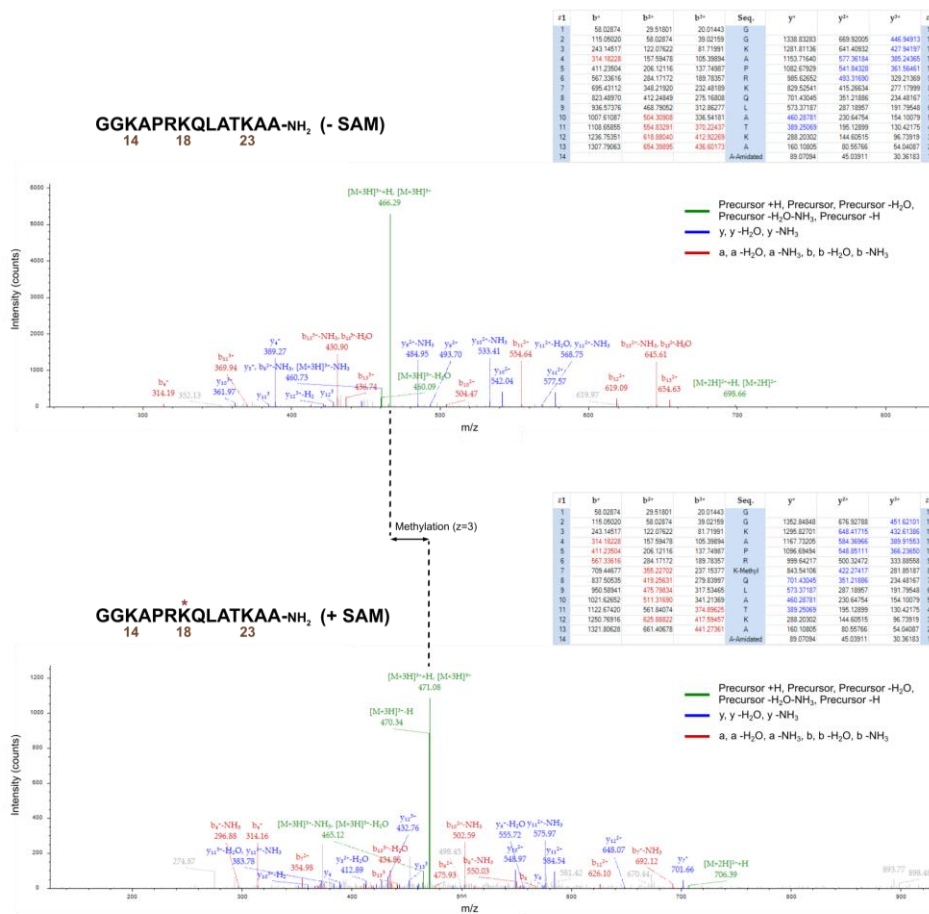

**Supplementary Figure 14: Mass spectrometry characterization of H3K18 monomethylation by TaSETup1.**

50 µg of a H3 derived 14-mer peptide flanking the lysine 18 were incubated with 3 µg TaSETup1 and with or without SAM for 2h at room temperature. Samples were analysed by LC-MS/MS as described in Methods. Upper panel shows the spectrum obtained in the sample without SAM, while the bottom panel displays the data obtained in the presence of SAM. The position of methylation is indicated on the H3K18 peptide sequence by an asterisk (\*).

565  
566  
567  
568  
569  
570  
571  
572  
573  
574  
575  
576  
577  
578  
579  
580  
581  
582  
583  
584  
585  
586  
587  
588  
589  
590  
591  
592  
593  
594  
595  
596  
597  
598  
599

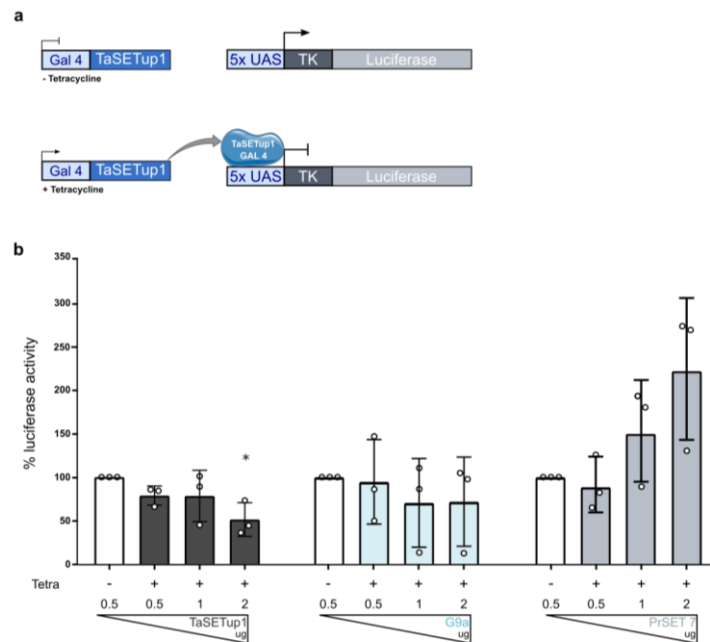

### Supplementary Figure 15: Luciferase assay of TaSETup1 activity.

- a. Schematic representation of 5X GAL4-UASTK-Luc reporter system, stably integrated in HEK293 cells (T-REx system). Cells were stably transfected with GAL4-TaSETup1 and grown in the presence or absence tetracycline for 48 h.
- b. Repression of Luciferase expression with increasing amounts of GAL4-TaSETup1 compared to GAL4-G9a (known repressive KMT) or GAL4-PrSET7 (known activating KMT) in the presence or absence of tetracycline. Data are represented as percent of uninduced controls (mean  $\pm$  SEM, n = 3).

Statistical Dunnett's multiple comparison test, two-sided: ns=not statistically significant  $p > 0.05$ ;

\* $p < 0.0299$

600  
601  
602  
603  
604  
605  
606  
607  
608  
609  
610  
611  
612  
613  
614  
615  
616  
617  
618  
619  
620  
621  
622  
623  
624  
625  
626  
627  
628  
629  
630  
631  
632  
633  
634

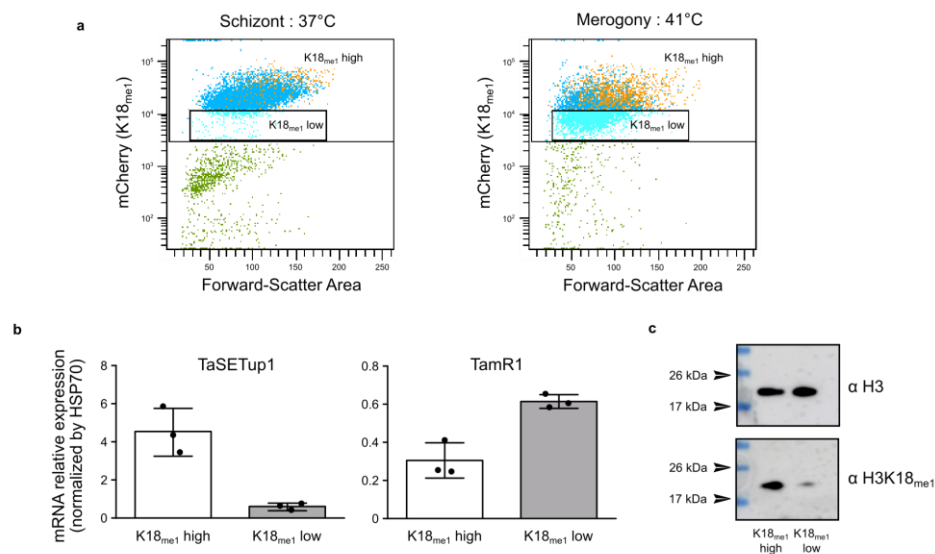

**Supplementary Figure 16: Merogony is associated with reduced TaSETup1 and reduced H3K18me1.**

- a. Flow cytometry (FACS) analysis of Tac12 infected macrophage cells grown at 37°C (schizont stage, left panel) or incubated at 41°C (merogony stage, right panel). Live cells labeled with antibodies against H3K18me1 (mCherry) and sorted by forward scatter and mCherry intensity levels.
- b. The two populations of cells (H3K18me1-hi and H3K18me1-lo) were analysed by RT-qPCR for the expression of the parasite *TamR1* gene (an indicator of merozoite differentiation) or *TaSETup1* (the schizont-expressed parasite KMT). The H3K18me-lo population was enriched for the *TamR1* differentiation marker and showed reduced *TaSETup1* expression. The graph shows the mean + SD for technical triplicates, n=3.
- c. Western blot analysis of the two sorted cell populations with an antibody specific to H3K18me1. Immunoblotting for histone H3 was used as control. This experiment has been done in technical replicate n=3.

635  
636  
637  
638  
639  
640  
641  
642  
643  
644  
645  
646  
647  
648  
649  
650  
651  
652  
653  
654  
655  
656  
657  
658  
659  
660  
661  
662  
663  
664  
665  
666  
667

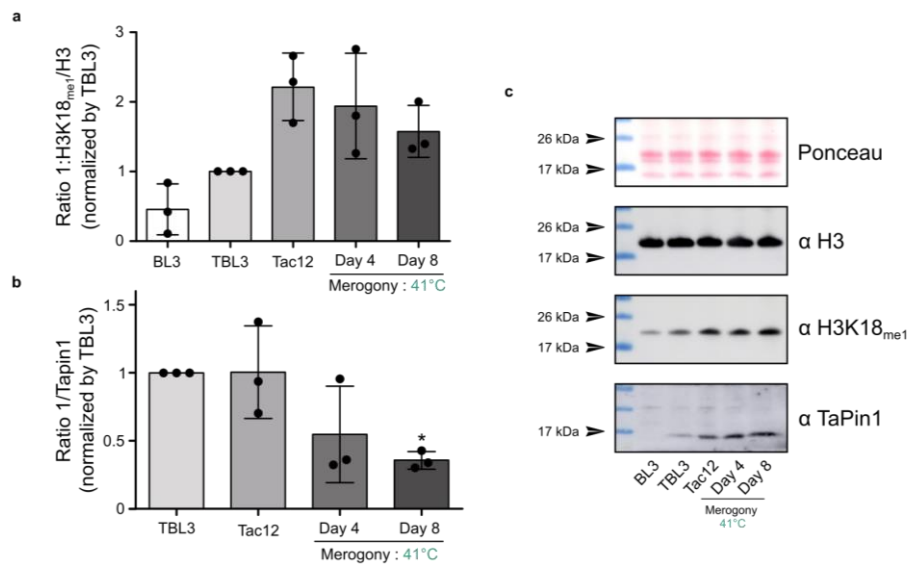

**Supplementary Figure 17: Immunoblot analysis of cells undergoing merogony.**

- Graphical representation of the H3K18me1: Histone H3 ratio (the levels in TBL3 infected cells were set at 1) comparing BL3 and TBL3 cells, or TaC12 macrophages (in the schizont stage or at 2 merogony stages, day 4 or 8).
- Graphic representation of the H3K18me1: Histone H3 ratio normalized for expression of TaPin1.
- Western blot analysis of H3, H3K18me1 and the parasite Tapin1 protein in BL3, TBL3, or Tac12 cells (in the schizont stage or at 2 merogony stages, day 4 or 8)

These experiments were performed three times independently with similar results; these data show one of these three experiments. Full scans blots are included in the Source Data file.

| Name  | gene ID | Original annotation        | Re-annotation (Blast2go)                                 | InterPro IDs                                                                                      |
|-------|---------|----------------------------|----------------------------------------------------------|---------------------------------------------------------------------------------------------------|
| M2M1  | TA1400  | hypothetical protein       | Tpr-related protein family member                        | no IP5 match                                                                                      |
| M2M2  | TA1975  | hypothetical protein       | Rhoptry-associated protein TA1975                        | IPR007480 (DUF529), SignalP                                                                       |
| M2M3  | TA0870  | Rhoptry-associated protein | Rhoptry-associated protein                               | IPR004318 (Rhoptry-associated protein 1), SignalP                                                 |
| M2M4  | TA17055 | hypothetical protein       | hypothetical protein TA17055                             | SignalP                                                                                           |
| M2M5  | TA21080 | Map2 kinase, putative      | putative cell-cycle-associated protein kinase MAPK       | IPR000719 (Protein kinase domain)                                                                 |
| M2M6  | TA18005 | hypothetical protein       | hypothetical protein TA18005                             | IPR022742 (serine aminopeptidase, S33), IPR007480 (DUF529), IPR029058 (alpha/beta hydrolase fold) |
| M2M7  | TA07305 | hypothetical protein       | hypothetical protein TA07305                             | no IP5 match                                                                                      |
| M2M8  | TA4210  | hypothetical protein       | membrane protein                                         | SignalP, Trmhelix                                                                                 |
| M2M9  | TA19675 | hypothetical protein       | AT hook motif-containing protein                         | no IP5 match                                                                                      |
| M2M10 | TA07435 | Sfil-subtelomeric fragment | Sfil-subtelomeric fragment related protein family member | IPR007480 (DUF529)                                                                                |
| M2M11 | TA4205  | hypothetical protein       | Sfil-subtelomeric fragment related protein family member | SignalP                                                                                           |
| M2M12 | TA16155 | hypothetical protein       | DNA topoisomerase VI, b subunit                          | IPR036890 (Histidine kinase/ASP90-like ATPase)                                                    |
| M2M13 | TA16660 | hypothetical protein       | Rhoptry neck protein 5                                   | Trmhelix                                                                                          |
| M2M14 | TA13045 | hypothetical protein       | putative duplicated carbonic anhydrase                   | IPR001148 (Alpha carbonic anhydrase domain), SignalP                                              |
| M2M15 | TA16420 | hypothetical protein       | hypothetical protein TA16420                             | SignalP                                                                                           |
| M2M16 | TA03755 | sporozoite surface antigen | sporozoite surface protein p67                           | IPR008845 (Sporozoite P67 surface antigen), SignalP, Trmhelix                                     |
| M2M17 | TA08380 | hypothetical protein       | protein 82                                               | IPR007480 (DUF529), SignalP                                                                       |
| M2M18 | TA21395 | hypothetical protein       | Tpr-related protein family member                        | Trmhelix                                                                                          |
| M2M19 | TA07395 | hypothetical protein       | Tpr-related protein family member                        | SignalP                                                                                           |
| M2M20 | TA04825 | hypothetical protein       | Tpr-related protein family member                        | SignalP, Trmhelix                                                                                 |

### Supplementary Table 1: 20 Cluster IV genes associated with life cycle transitions.

Original annotation (and functional re-annotation) of the 20 Cluster IV genes (i.e. enriched H3K18me1) that we identified as potentially up-regulated in macroschizont to merozoite transition (M2M), downregulated in sporozoite to macroschizont transition (S2M). The table shows the *Theileria* gene IDs, re-annotation derived from Blast2GO, official annotation available at PiroplasmaDB and domain content of the 20 genes (see Fig. 4b).

703  
704  
705  
706  
707  
708  
709  
710  
711  
712  
713  
714  
715  
716  
717  
718  
719  
720  
721  
722  
723  
724  
725  
726  
727  
728  
729  
730  
731  
732  
733  
734  
735  
736  
737

| Gene ID | original annotation                                                       | Re-annotat on (Blast2go)                                 | InterPro IDs                                            |
|---------|---------------------------------------------------------------------------|----------------------------------------------------------|---------------------------------------------------------|
| TA15445 | hypothet cal protein                                                      | Tpr-related protein family member                        | TMHelix                                                 |
| TA19610 | Theileria-specific c hypothet cal telomeric sf I fragment-related protein | diacylglycerol O-acyltransferase                         | no IPS match                                            |
| TA21205 | hypothet cal protein                                                      | hypothet cal protein TA21205                             | SignalP                                                 |
| TA04355 | hypothet cal protein                                                      | pentatricopept de repeat containing protein              | no IPS match                                            |
| TA18855 | Tpr-related protein family member                                         | Sf I-subtelomeric fragment related protein family member | PUF529 (IPRO07480), SignalP                             |
| TA09600 | cysteine proteinase                                                       | Tpr-related protein family member                        | TMHelix                                                 |
| TA04130 | hypothet cal protein                                                      | alpha/beta hydrolase                                     | no IPS match                                            |
| TA17491 | hypothet cal protein                                                      | Sf I-subtelomeric fragment related protein family member | no IPS match                                            |
| TA17325 | Tpr-related protein family member                                         | integral membrane protein                                | TMHelix                                                 |
| TA17115 | Tpr-related protein family member                                         | Sf I-subtelomeric fragment related protein family member | IPRO07480 ; SignalP                                     |
| TA08525 | hypothet cal protein                                                      | inner membrane complex protein 1e                        | IPRO02086                                               |
| TA17100 | hypothet cal protein                                                      | hypothet cal protein TA17100                             | no IPS match                                            |
| TA07025 | Tpr-related protein family member                                         | Tpr-related protein family member                        | TMHelix                                                 |
| TA20150 | hypothet cal protein                                                      | Tpr-related protein family member                        | TMHelix                                                 |
| TA14310 | hypothet cal protein                                                      | ubiquit n-protein ligase                                 | SignalP                                                 |
| TA07162 | hypothet cal protein                                                      | hypothet cal protein TA07162                             | SignalP                                                 |
| TA19445 | hypothet cal protein                                                      | phoptry neck protein 2                                   | TMHelix                                                 |
| TA14665 | hypothet cal protein                                                      | Class II myosin heavy chain                              | SignalP; TMHelix                                        |
| TA18780 | hypothet cal protein                                                      | integrin beta-3-like isoform X2                          | no IPS match                                            |
| TA05245 | hypothet cal protein                                                      | Tpr-related protein family member                        | TMHelix                                                 |
| TA07920 | Tpr-related protein family member                                         | hypothet cal protein TA07920                             | no IPS match                                            |
| TA21385 | ubiquit n-conjugat ng enzyme E2                                           | Tpr-related protein family member                        | no IPS match                                            |
| TA13940 | hypothet cal membrane protein                                             | Tpr-related protein family member                        | TMHelix                                                 |
| TA21390 | hypothet cal protein                                                      | Tpr-related protein family member                        | TMHelix                                                 |
| TA21380 | phosphate transporter                                                     | Tpr-related protein family member                        | no IPS match                                            |
| TA16050 | hypothet cal protein                                                      | Sf I-subtelomeric fragment related protein family member | IPRO07480 ; SignalP                                     |
| TA11680 | hypothet cal protein                                                      | perforin-like protein plp1                               | IPRO20864 ; SignalP                                     |
| TA16485 | hypothet cal protein                                                      | transcript on factor with AP2 domain-containing protein  | IPRO28078 ; IPRO01471                                   |
| TA05615 | Tpr-related protein family member                                         | hypothet cal protein TA05615                             | SignalP                                                 |
| TA09115 | Sf I-subtelomeric fragment related protein family member                  | membrane protein                                         | TMHelix                                                 |
| TA07985 | hypothet cal protein                                                      | hypothet cal product                                     | IPRO36259 ; TMHelix                                     |
| TA10690 | hypothet cal protein                                                      | ubiquit n-conjugat ng enzyme subfamily protein           | IPRO00608 ; IPRO16135                                   |
| TA13540 | hypothet cal protein                                                      | cyclic nucleot de-binding domain containing protein      | IPRO00595 ; IPRO18490 ; IPRO18490 ; IPRO11992           |
| TA21050 | hypothet cal protein                                                      | B-cell receptor CD22 isoform X1                          | TMHelix                                                 |
| TA18600 | hypothet cal protein                                                      | integral membrane protein                                | TMHelix                                                 |
| TA18275 | Tpr-related protein family member                                         | early endosome ant gen 1                                 | no IPS match                                            |
| TA03521 | Tpr-related protein family member                                         | Sf I-subtelomeric fragment related protein family member | IPRO07480                                               |
| TA14955 | hypothet cal protein                                                      | signal pept de containing protein                        | IPRO07480 ; SignalP                                     |
| TA17358 | Tpr-related protein family member                                         | Sf I-subtelomeric fragment related protein family member | IPRO07480                                               |
| TA20020 | Sf I-subtelomeric fragment related protein family member                  | putat ve anonymous ant gen-1                             | IPRO16024                                               |
| TA18980 | hypothet cal protein                                                      | putat ve transmembrane protein                           | no IPS match                                            |
| TA21375 | hypothet cal protein                                                      | Tpr-related protein family member                        | no IPS match                                            |
| TA17490 | Sf I-subtelomeric fragment related protein family member                  | Sf I-subtelomeric fragment related protein family member | no IPS match                                            |
| TA13530 | integral membrane protein                                                 | phosphate transporter                                    | IPRO01204 ; TMHelix                                     |
| TA13535 | Theileria-specific c hypothet cal telomeric sf I fragment-related protein | cyclic nucleot de-binding domain containing protein      | IPRO10875                                               |
| TA04105 | Sf I-fragment related sub-telomeric hypothet cal protein family member    | disept dyl aminopept dase 2                              | IPRO00668 ; IPRO14882 ; SignalP ; IPRO36496 ; IPRO38765 |
| TA07585 | Sf I-fragment related sub-telomeric hypothet cal protein family member    | CTD nuclear envelope phosphatase 1                       | TMHelix                                                 |
| TA21370 | Sf I-subtelomeric fragment related protein family member                  | putat ve transmembrane protein                           | IPRO21366 ; TMHelix                                     |
| TA13515 | isoparty(acid) protease                                                   | transcript on factor with AP2 domain(s)                  | IPRO01471                                               |
| TA15500 | hypothet cal protein                                                      | Tpr-related protein family member                        | TMHelix                                                 |
| TA17685 | hypothet cal protein                                                      | plasmepsin V                                             | IPRO33121 ; IPRO21109                                   |
| TA03855 | hypothet cal protein                                                      | Tpr-related protein family member                        | TMHelix                                                 |
| TA03300 | Sf I-subtelomeric fragment related protein family member                  | hypothet cal protein TA03300                             | IPRO07480 ; SignalP                                     |
| TA19115 | hypothet cal protein                                                      | Sf I-subtelomeric fragment related protein family member | IPRO07480                                               |
| TA14680 | Sf I-subtelomeric fragment related protein family member                  | hypothet cal protein TA14680                             | SignalP; TMHelix                                        |
| TA06795 | hypothet cal protein                                                      | Filamin/ABP280 repeat-containing protein                 | IPRO17868 ; IPRO14756                                   |
| TA04790 | hypothet cal protein                                                      | Tpr-related protein family member                        | TMHelix                                                 |
| TA03540 | hypothet cal protein                                                      | hypothet cal protein TA03540                             | SignalP                                                 |
| TA15485 | Theileria-specific c hypothet cal protein                                 | Tpr-related protein family member                        | TMHelix                                                 |
| TA14120 | hypothet cal protein                                                      | Tpr-related protein family member                        | no IPS match                                            |
| TA02020 | hypothet cal protein                                                      | 200 kDa ant gen p200                                     | no IPS match                                            |
| TA07955 | hypothet cal protein                                                      | hypothet cal protein TA07955                             | no IPS match                                            |
| TA15095 | hypothet cal protein                                                      | Tpr-related protein family member                        | no IPS match                                            |
| TA14285 | hypothet cal protein                                                      | Sf I-subtelomeric fragment related protein family member | IPRO07480 ; SignalP                                     |
| TA14835 | hypothet cal protein                                                      | hypothet cal protein TA14835                             | no IPS match                                            |
| TA17500 | hypothet cal protein                                                      | Sf I-subtelomeric fragment related protein family member | no IPS match                                            |
| TA03845 | Theileria parva Tpr-related protein                                       | Tpr-related protein family member                        | TMHelix                                                 |

**Supplementary Table 2: 67 Cluster IV genes associated with M2M transitions.**

Original annotation (and functional re-annotation) of the 67 M2M\_Cluster IV genes potentially up regulated in macroschizont to merozoite transition (M2M). The table shows the *Theileria* gene IDs, re-annotation derived from Blast2GO, official annotation available at PiroplasmaDB and domain content of the 67 genes (see Fig. 4b).

738  
739  
740  
741  
742  
743  
744  
745  
746  
747  
748  
749  
750  
751  
752  
753  
754  
755  
756  
757  
758  
759  
760  
761  
762  
763  
764  
765  
766  
767  
768  
769  
770  
771  
772

| Gene ID | Protein ID | cluster | Description |
|---------|------------|---------|-------------|
| TA18095 | Q4UB32     | 1       |             |
| TA02615 | Q4UD26     | 1       |             |
| TA16105 | Q4UIG3     | 1       |             |
| TA16535 | Q4UIY2     | 1       |             |
| TA17415 | Q4UAU9     | 2       |             |
| TA12015 | Q4UDT1     | 2       | TaAP2.me2   |
| TA09965 | Q4U8Q5     | 3       |             |
| TA07550 | Q4UA38     | 3       |             |
| TA04145 | Q4UCX3     | 3       |             |
| TA11665 | Q4UDL7     | 3       |             |
| TA20595 | Q4UH38     | 3       |             |
| TA11145 | Q4U8H9     | 4       | TaAP2.me1   |
| TA10940 | Q4U982     | 4       |             |
| TA08375 | Q4U9N8     | 4       |             |
| TA07100 | Q4UAC2     | 4       |             |
| TA05055 | Q4UBQ3     | 4       |             |
| TA13515 | Q4UEK3     | 4       | TaAP2.g     |
| TA19920 | Q4UG29     | 4       |             |
| TA06995 | Q4UHX0     | 4       |             |
| TA16485 | Q4UIX2     | 4       | TaAP2.me3   |

**Supplementary Table 3: List of *Theileria* ApiAP2 genes and their H3K18me1 status (cluster).**

Table showing the GeneID, uniprotID and the cluster assignment for all the 20 *Theileria* ApiAP2 genes.

773  
774  
775  
776  
777  
778  
779  
780  
781  
782  
783  
784  
785  
786  
787  
788  
789  
790  
791  
792  
793  
794  
795  
796  
797  
798  
799  
800  
801  
802  
803  
804  
805  
806  
807

| Name     | Uniprot/Interpro | ptrioplasmadb | ensembl  | Gene_id | refseq_prot | refseq_mrna | Cluster # | gene size (nt) | # exons | prot size (aa) | mass (kDa) |
|----------|------------------|---------------|----------|---------|-------------|-------------|-----------|----------------|---------|----------------|------------|
| TaSETup1 | Q4UHT5           | TA06820       | CAI73354 | 3863755 | XP_954031   | XM_948938   | II        | 1473           | 8       | 490            | 56.8       |
| TaSETup2 | Q4UGM0           | TA21435       | CAI3769  | 3863445 | XP_954446   | XM_949353   | III       | 2532           | 7       | 843            | 97         |
| TaSETup3 | Q4U8M4           | TA09850       | CAI76819 | 3863308 | XP_953444   | XM_948351   | IV        | 3252           | 2       | 1083           | 122.4      |
| TaSETup4 | Q4U8M9           | TA05190       | CAI75772 | 3864564 | XP8955248   | XM_950155   | IV        | 4128           | 4       | 1375           | 159.5      |
| TaSETup5 | Q4U8P1           | TA09890       | CAI76812 | 3863102 | XP_953439   | XM_948344   | IV        | 10788          | 9       | 3595           | 415.4      |
| KDM1     | Q4UG30           | TA19925       | CAI73959 | 3864155 | XP_954636   | XM_949543   | III       | 2624           | 12      | 709            | 81.7       |
| KDM2     | Q4UEH4           | TA13355       | CAI74515 | 3861560 | XP_952247   | XM_947154   | II        | 1181           | 5       | 324            | 37.1       |

**Supplementary Table 4: List of *Theileria* SET-domain containing genes (*TaSETup* genes).**

Table showing the gene references, cluster allocation and predicted protein size for the five SETup protein methyltransferases in the *T.annulata* genome (see Supplementary Fig. S10).



| Target genes              | Forward                                             | Reverse                                               |
|---------------------------|-----------------------------------------------------|-------------------------------------------------------|
| <b>Cloning</b>            |                                                     |                                                       |
| Ga14_SerB_Smal_F / NotI_R | ATCCCGGGCCATGTACAAATATTCGAATGAAGAAACG               | TCGAGCGCCCGCTCATGCTTATCATCAGGTGATTTCT                 |
| TasE1_B_Gateway           | ggggacacacttggcaaaaagtggcctgTACAA TAAATCGCAATGAAGAA | ggggacacacttggcaaaaagtggcctgTAAATGCTTATCAGGTGATTTCTAC |
| TasE1-B-H206F             | CCTCATGCTGTTGGCATCACAC                              | GGTTTACAGCTAAAGGCGACATAGG                             |
| <b>qPCR</b>               |                                                     |                                                       |
| TamR1                     | CCACTCTGTAGCGGGTAAA                                 | TTGTGGAGGTACTGACCCAAA                                 |
| HSP70                     | ACGCAAAATGGAAATCTCAAC                               | TATTCGTGTGCTCTGTAA                                    |
| TasE1up4                  | TGGGAAACTATCACCCGGCAC                               | GTCCCAAAACCAAGCAAT                                    |
| TasE1up5                  | ATCGAGACTTACGACGTGGC                                | ATGCTGTGCACCACTTACT                                   |
| TasE1up3                  | TTGTGGGGCAAGTTGAGT                                  | GTGAAAACGCCGAGTATGC                                   |
| TasE1up2                  | AAGTGAGCACCCCGATGTT                                 | TGTACGGCTCAACTCCGAAC                                  |
| TasE1up1                  | GATATTGGCAGMATCCCGCC                                | TGTTTTGGTTTTCCACCCA                                   |
| HDM1_TA19925              | AGCGGACCTCAACCGTCTTT                                | TGAGCAGTGACCCATCAC                                    |
| HDM2_TA13355              | TAGGGCAATGAAGCCACG                                  | GGCCTTGGAGATGAACCG                                    |
| M1_TA21400                | ACTAAGGGCTGGTAAATGGTGC                              | TGGAGCTTTGTCTGTAAGCTT                                 |
| M2_TA19275                | AAGCCGGTGAACATACAGT                                 | CCGGCATTTGGTAGGGGTTT                                  |
| M3_TA05870                | TGGTCCAGTTAGTGTGGG                                  | GCCTAGCGAGCACCAATG                                    |
| M4_TA17055                | GCATCGTTGTTGGACTGGC                                 | TAGTCTTGGCACATCTGTC                                   |
| M5_TA21080                | GCACTGGAACTGGTGCAAAA                                | TAGGACCTGAGCCAACAT                                    |
| M6_TA18005                | CAATGTGGGATGTCAACGGG                                | GATGGCATCACATTTGGGA                                   |
| M7_TA07305                | TGAGAGTGCATCGAAGGAGC                                | ACTGTCCAACAAAGGCTCA                                   |
| M8_TA14210                | TGGCGAAGATGGGAATGTC                                 | ATCTATGGCAACTCTGTGG                                   |
| M9_TA19675                | GGCAAGAAAGGGTTAGGGA                                 | CTCTGAGCGGATCATCATCT                                  |
| M10_TA07435               | AAAAGAAAGGGCCGATACCGTT                              | TGMAACCAATTGACCAGTT                                   |
| M11_TA14205               | CGAGACCTGTTCCGGTGA                                  | TCAITCCACGTTTTGGCGAGT                                 |
| M12_TA16155               | TGCAATTGACGCATGCAAMGA                               | CCCGACCATATCGAAMACA                                   |
| M13_TA16660               | GGCCGTGCTTAGATGAGCA                                 | CTTCCTTTGGCGCATGAGAT                                  |
| M14_TA13045               | TGGCATGTAGTGTGCTGAGAT                               | ACCAATGTCACCTGTTTCCA                                  |
| M15_TA16420               | TCCGCATGTGAAGCAGTATCT                               | CTGAAACCTCCGGTAAGTTGT                                 |
| M16_TA03755               | GGAAGATCACTAAGGGGGCA                                | TGAGGGGTCTGACGGTACAT                                  |
| M17_TA08360               | ATTTTTCAAAAGCGGGTGGCCG                              | CGTGTCTTCCGTCCCTAACCA                                 |
| M18_TA21395               | GGTAAACCACTCCGATGGCCGG                              | AGCGATGATGGTGGCGGTTA                                  |
| M19_TA04795               | CCAACGGCACTCAAGTGGT                                 | TCACCAAGTCCCATCATCGAG                                 |
| M20_TA04825               | GCTAAAGAAAGAGTGTGGGG                                | TCTTACTTGGTGTCCACCGC                                  |

**Supplementary Table 5: List of oligonucleotides used in this study for cloning, qPCR analysis or ChIP-PCR experiments.**
